# Supplementary figures and images for: Genetics and Epigenetics of Atopic Dermatitis: An Updated Systematic Review
Source: MDPI journal article supplement (doi:10.3390/genes11040442), 2020-04-18

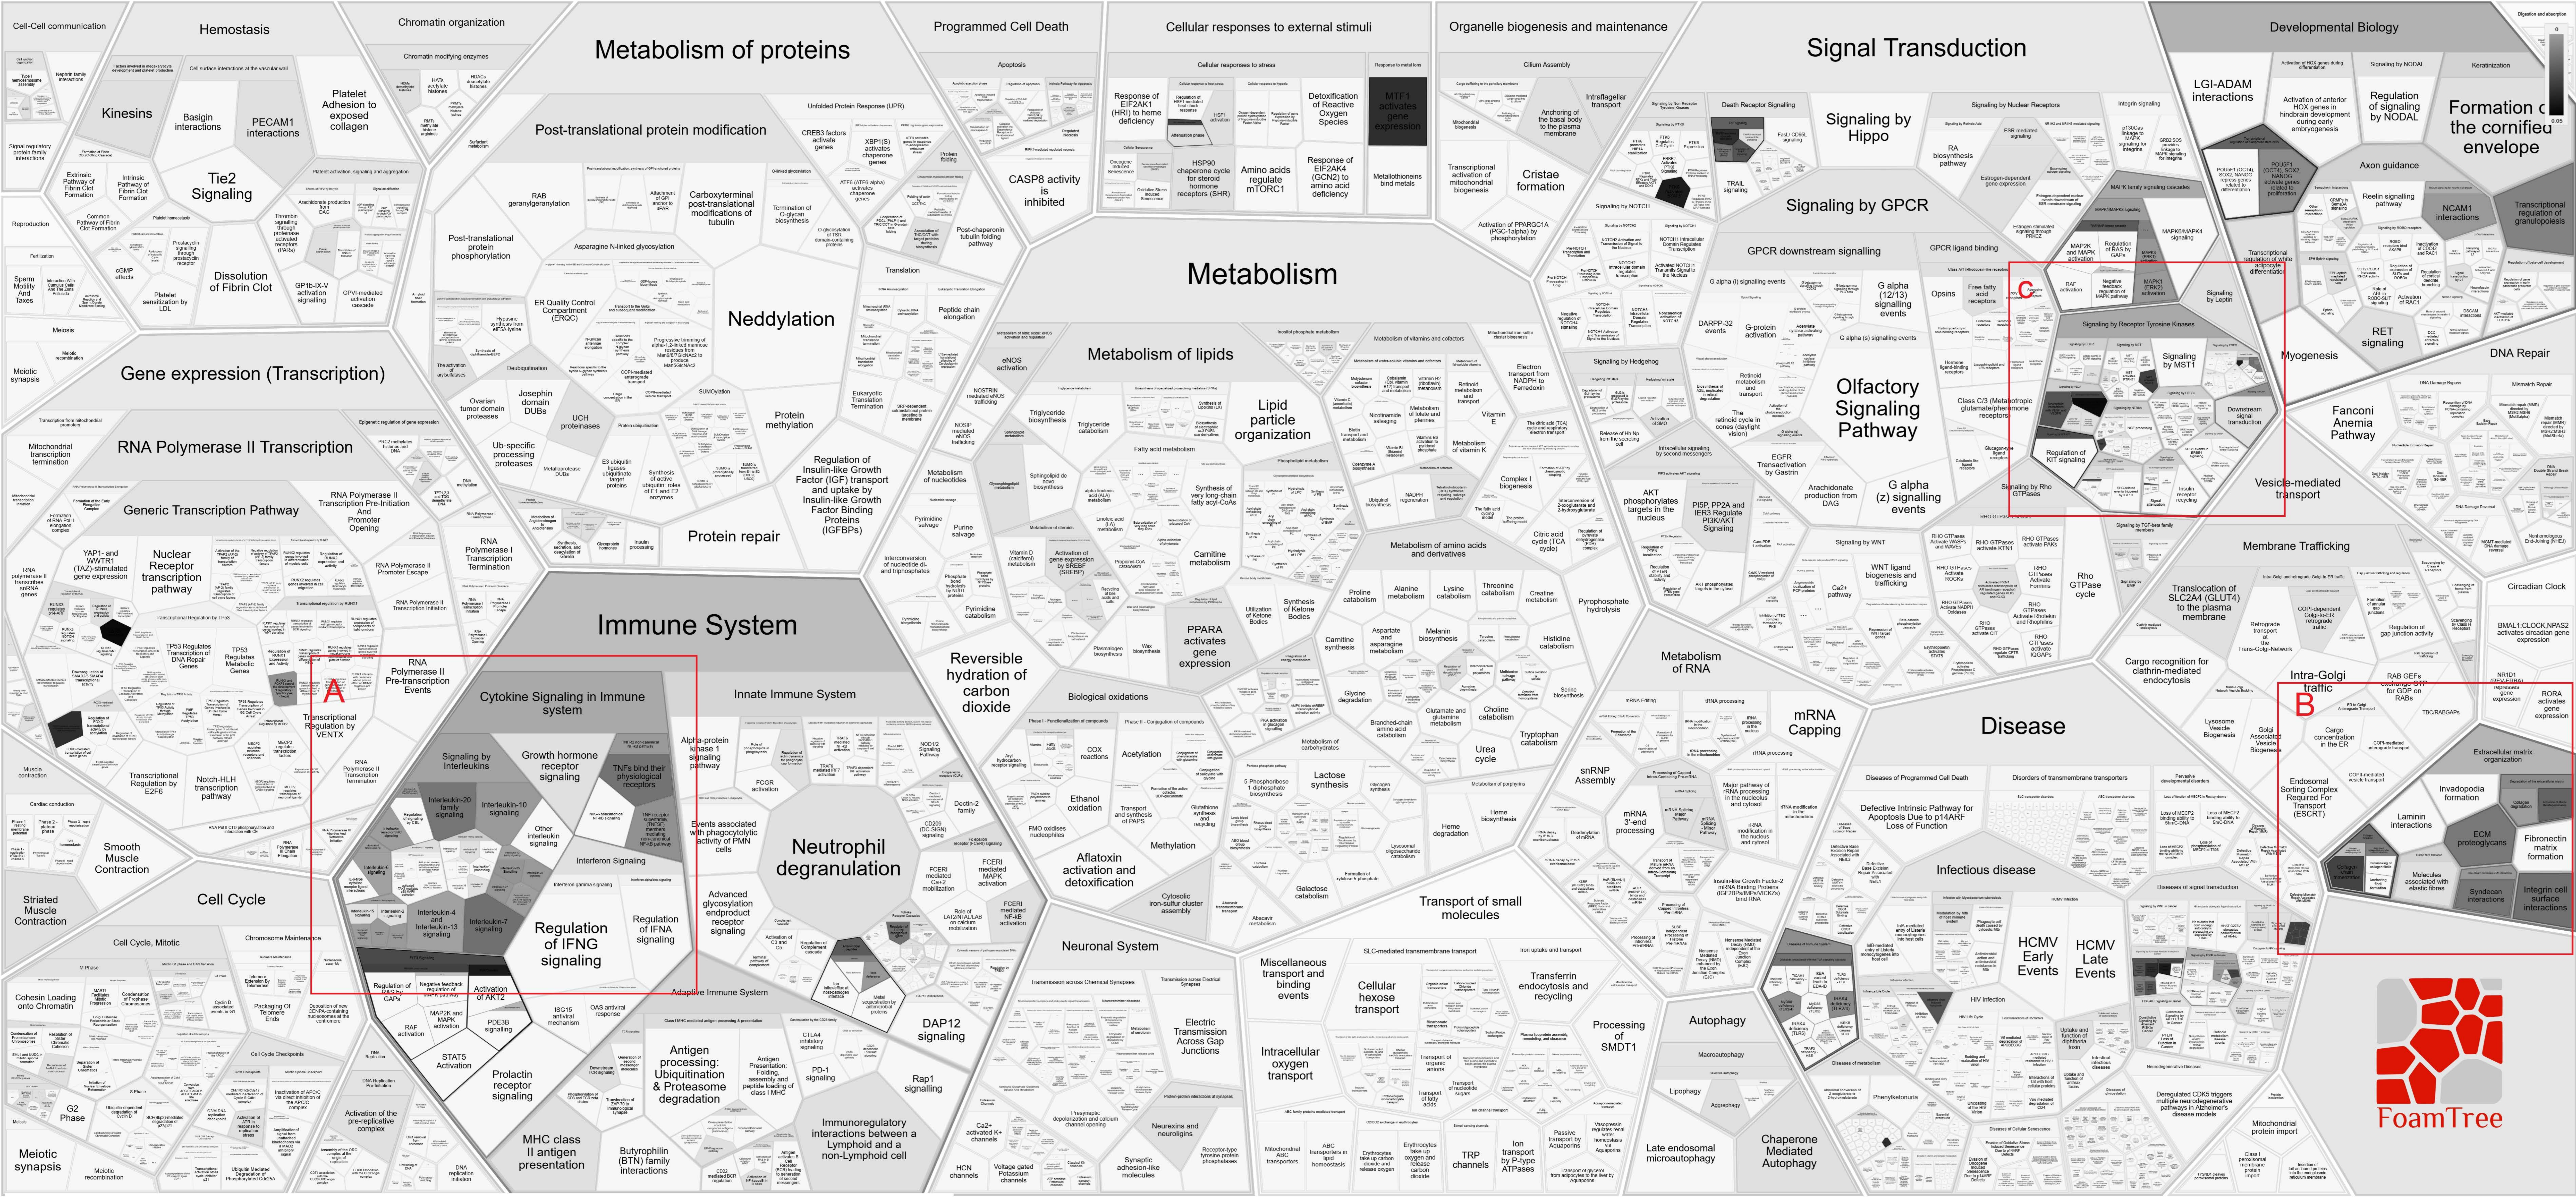

# Metabolism of proteins

## Metabolism

# Signal Transduction

## Immune System

## Disease

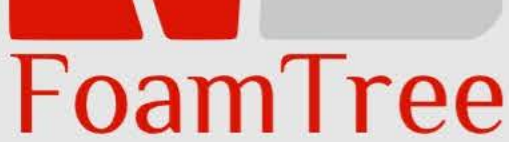

FoamTree

Supplement: s1 [file s1]
